# Supplementary material for: NIR-laser-induced selective rotamerization of hydroxy conformers of cytosine
Source: Royal Society of Chemistry journal article supplement (doi:10.1039/c0cp00177e), 2010-01-01

## NIR-Laser-Induced Selective Rotamerization of Hydroxy Conformers of Cytosine

Leszek Lapinski,<sup>a</sup> Maciej J. Nowak,<sup>a</sup> Igor Reva,<sup>b</sup> Hanna Rostkowska,<sup>a</sup> Rui Fausto,<sup>b</sup>

<sup>a</sup> Institute of Physics, Polish Academy of Sciences, Al. Lotnikow 32/46, 02-668 Warsaw, Poland.

<sup>b</sup> Department of Chemistry, University of Coimbra, P-3004-535 Coimbra.

### Electronic Supplementary Information

**Figure S1.** Mid-IR spectra of cytosine isolated in an Ar matrix: (black) recorded after deposition of the matrix; (red) after irradiation at  $7013\text{ cm}^{-1}$ ; (blue) after irradiation at  $7034\text{ cm}^{-1}$ .

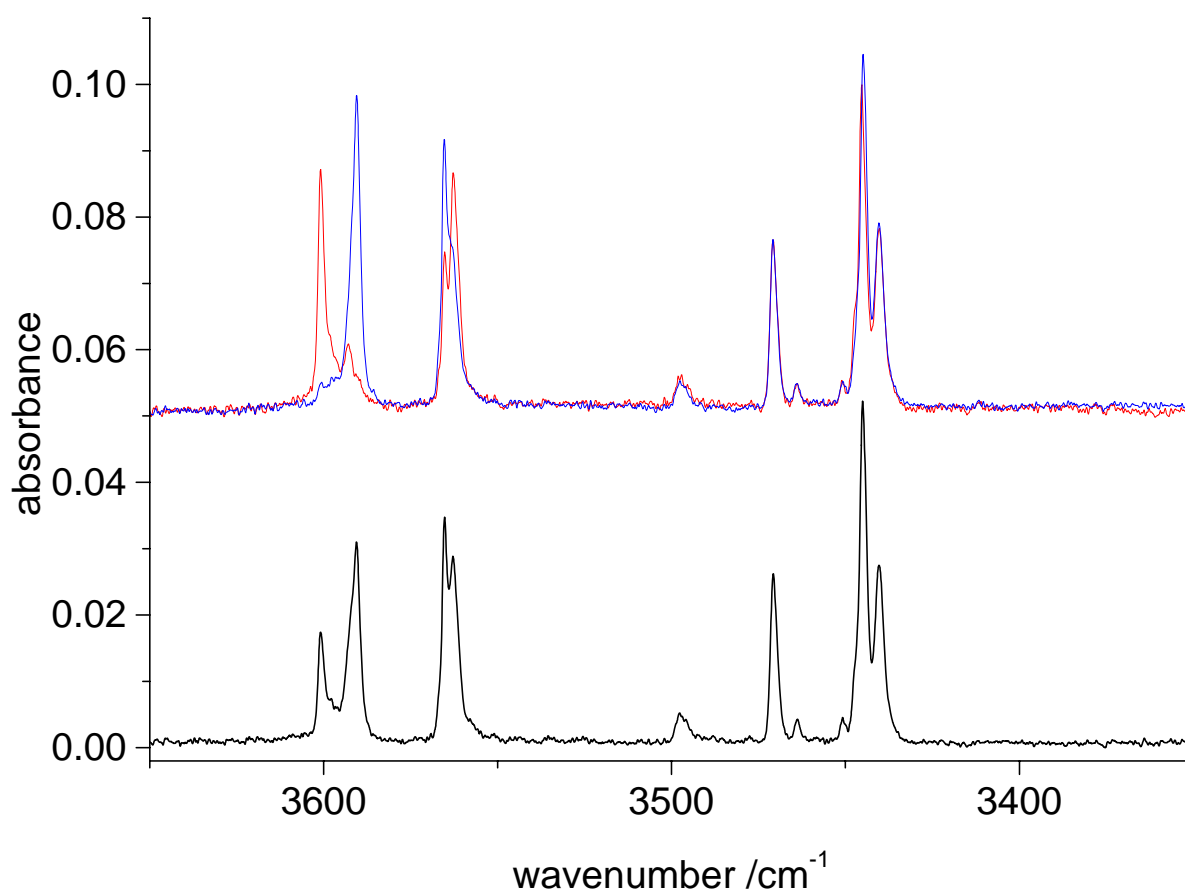

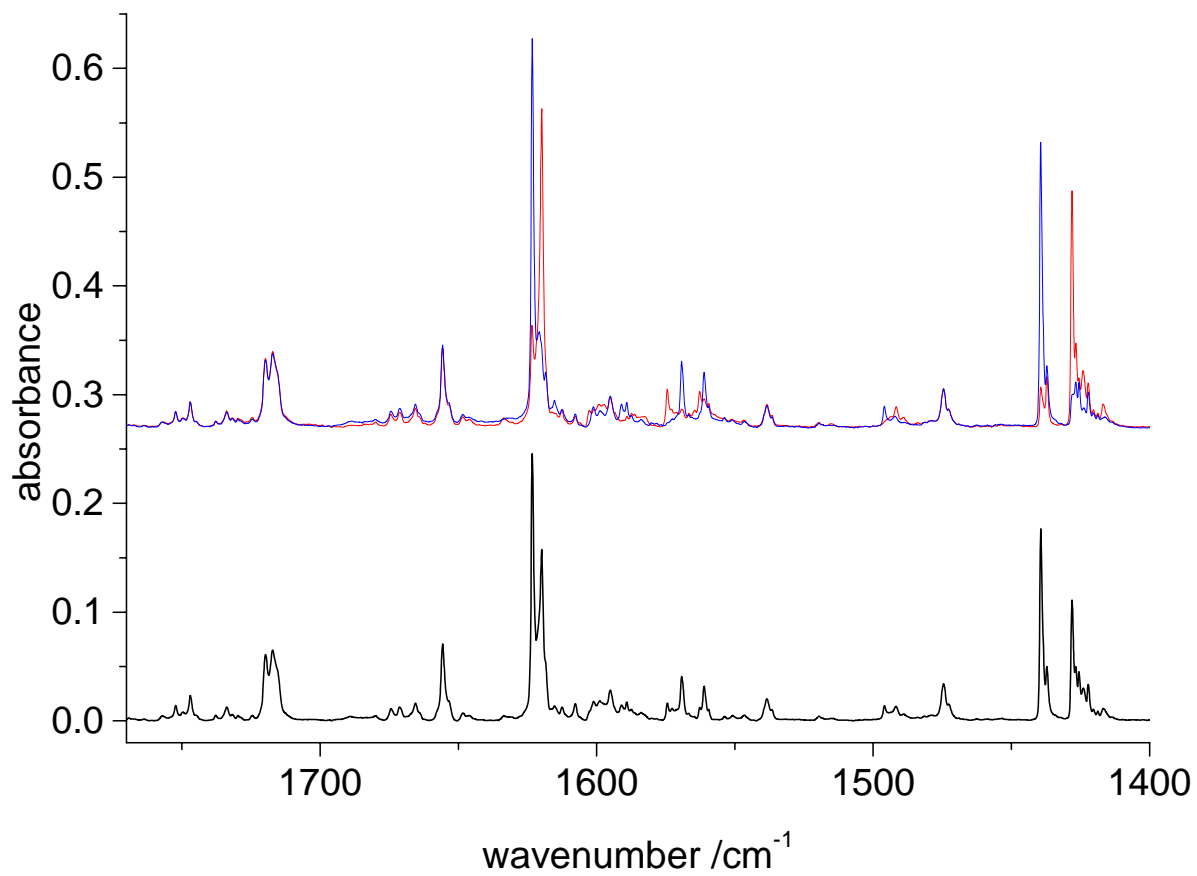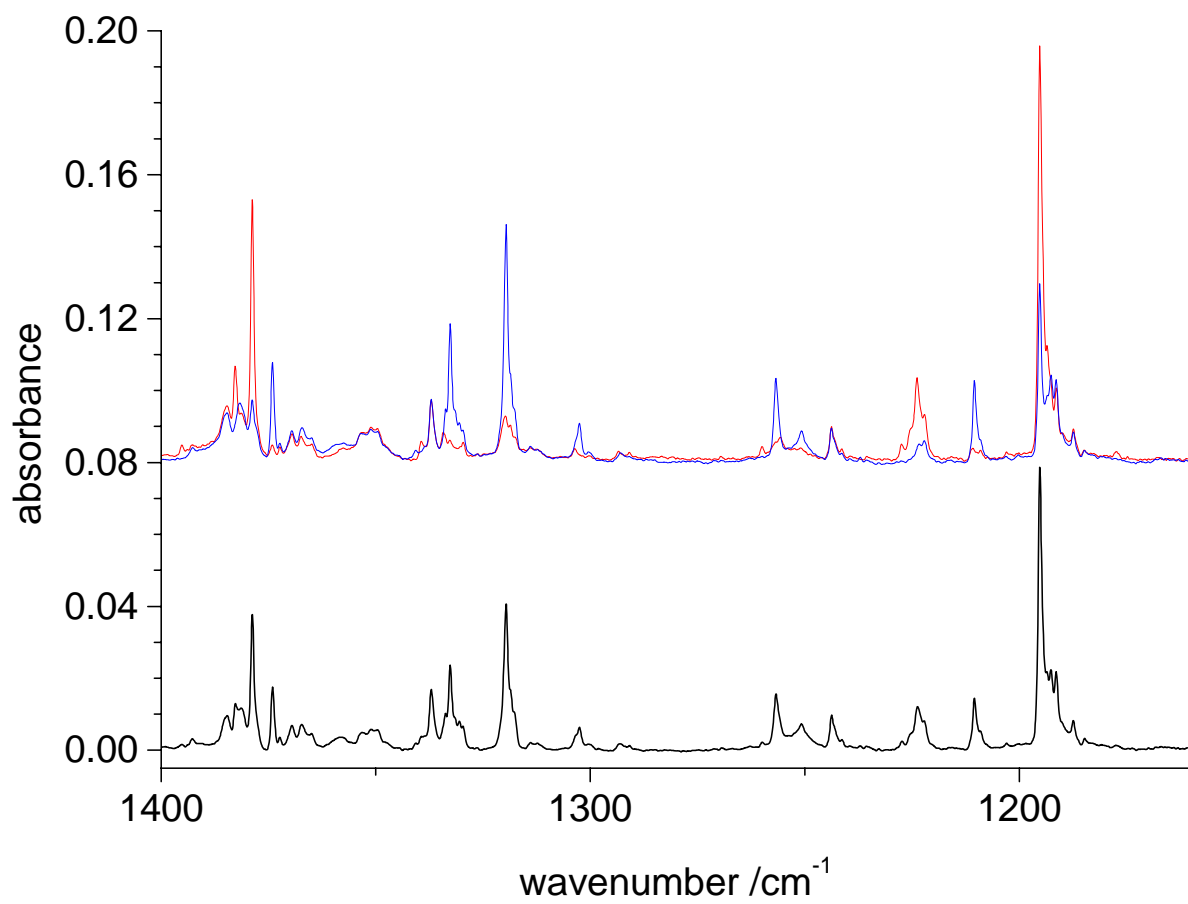

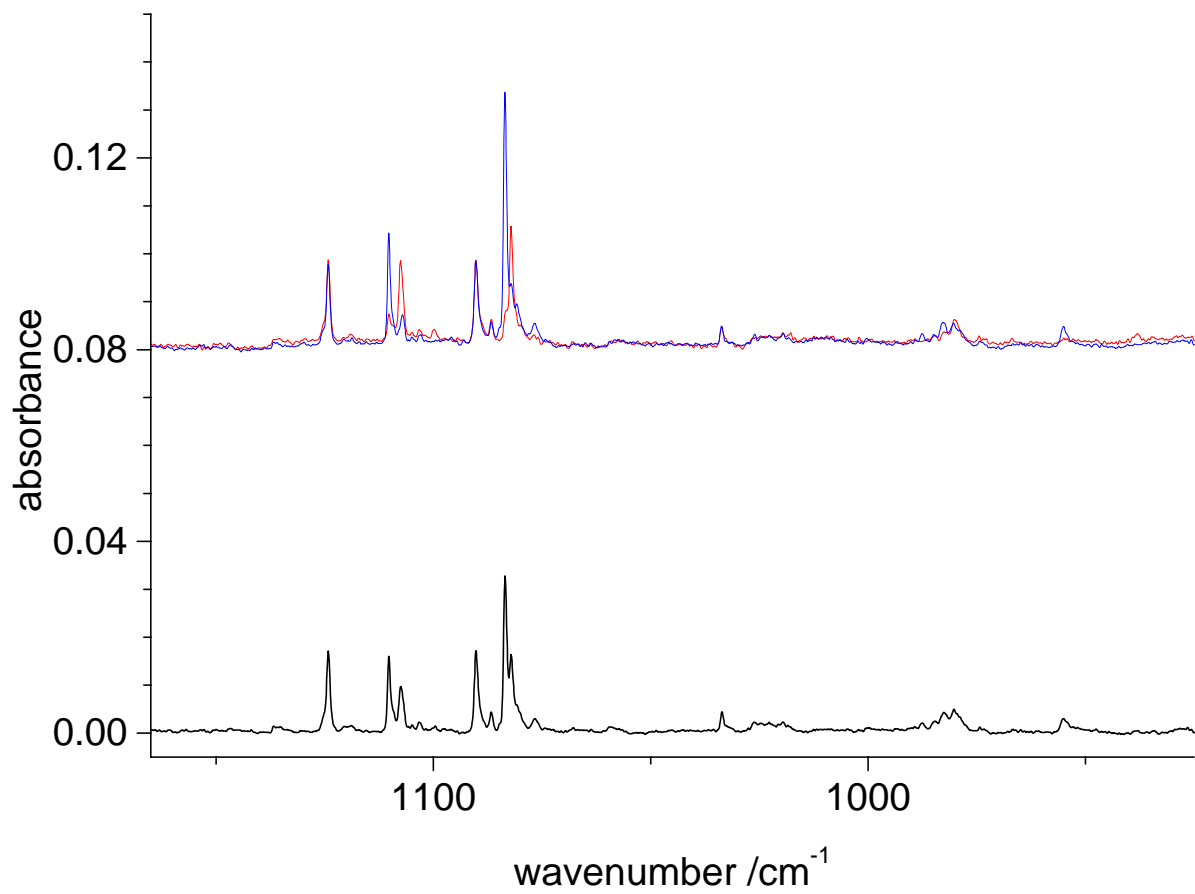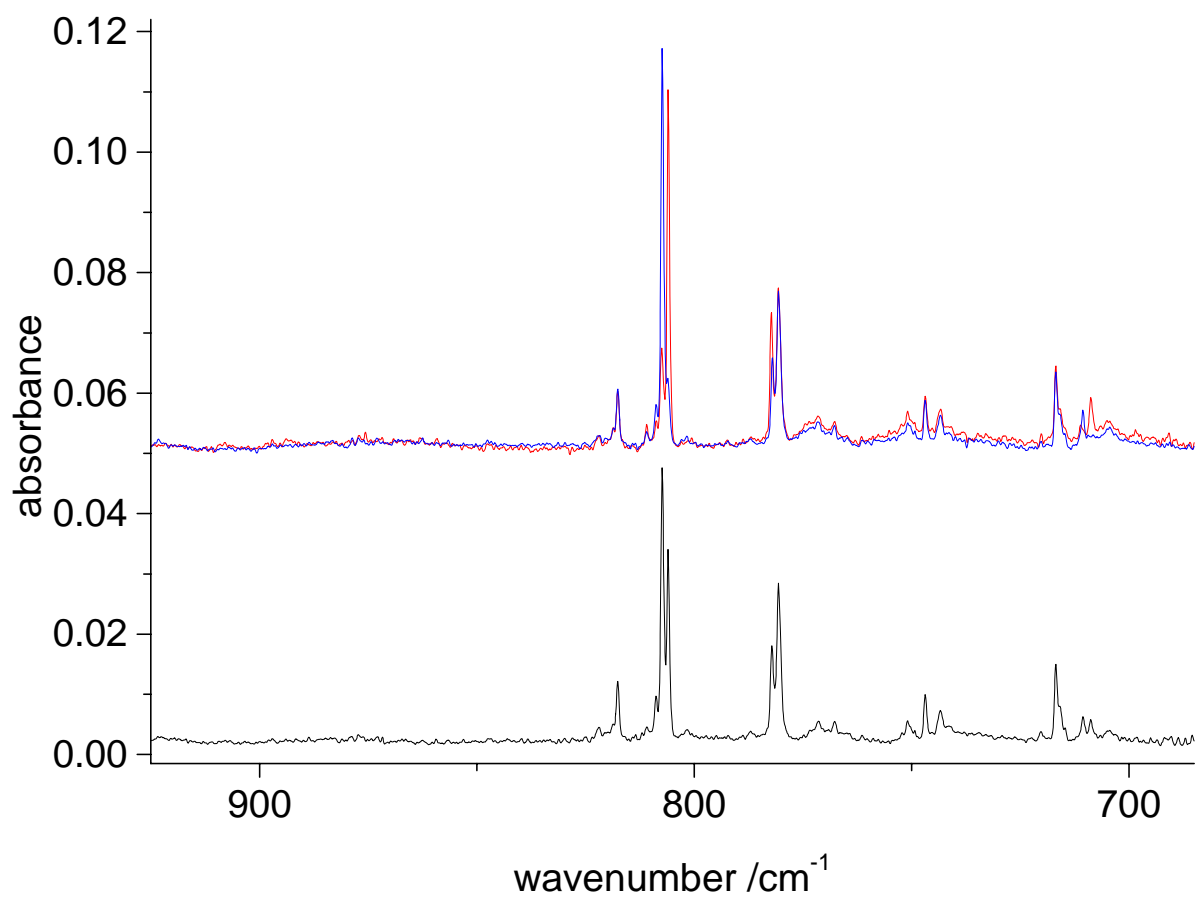

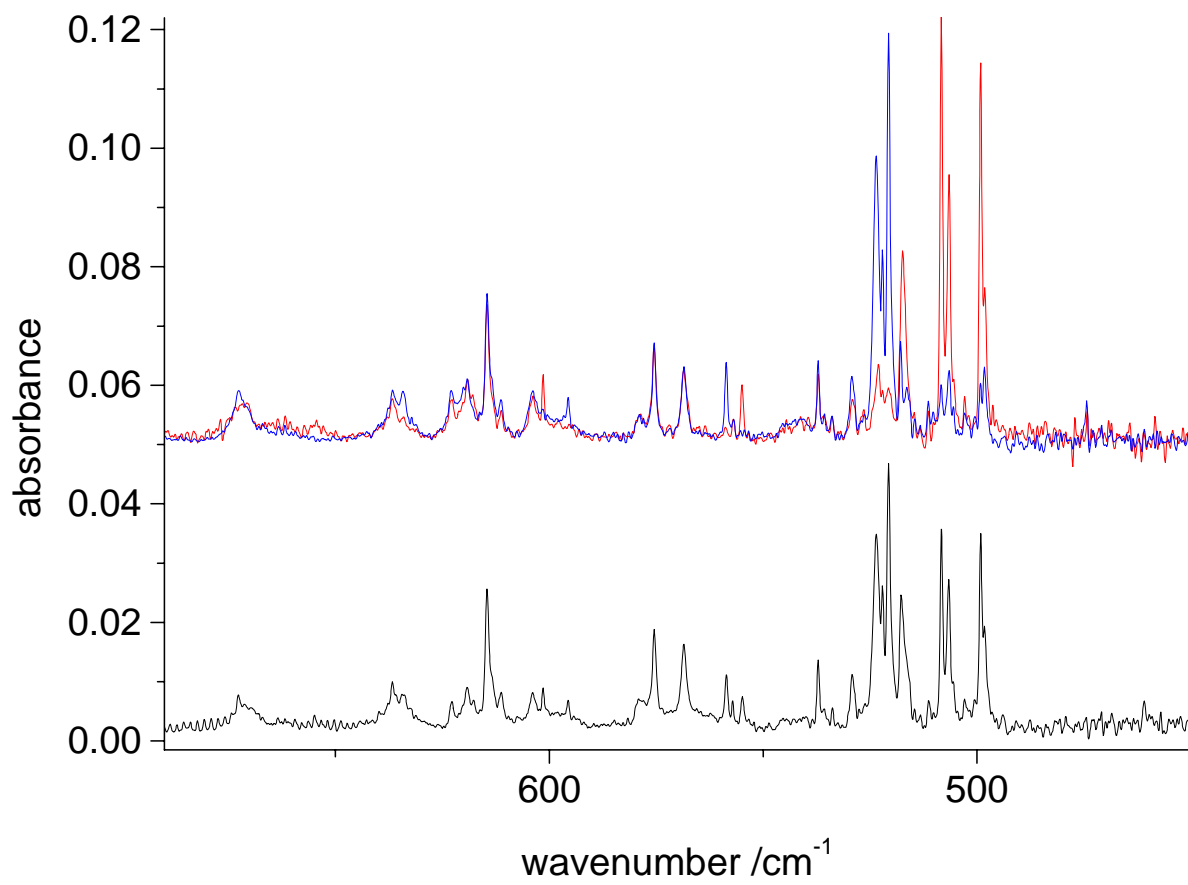

Supplement: c0cp00177e.pdf [file c0cp00177e.pdf]
